# Supplementary material for: Lgl2 Executes Its Function as a Tumor Suppressor by Regulating ErbB Signaling in the Zebrafish Epidermis
Source: PLoS Genet. 2009 Nov 13;5(11):e1000720. doi: 10.1371/journal.pgen.1000720 (PMC2771016; doi:10.1371/journal.pgen.1000720)
Supplement: Table S1 — Expression profile of pen/lgl2 compared to wild type. Using microarray technique the expression profile of wild-type versus mutant zebrafish larval tails, posterior to the anal opening was analysed. A significance threshold of adj. p-value of 10−6 (FDR) resulted in 117 genes to be significantly differentially expressed. Within those, most prominent genes, involved in EMT and cell cycle, as well as cytoskeleton rearrangements, can be found. Additionally, genes involved in the formation of tight and adherens junctions are present. The down-regulated genes are indicated in red in this table whereas up-regulated genes are indicated in black. (0.03 MB XLS) [file pgen.1000720.s005.xls]

## Sheet: Sheet1
Number	Gene Description	adj P-value (FDR)	Fold Change
ref|NM_213123	matrix metalloproteinase 9	1.18581e-48	13.8906
ref|NM_131637	claudin 7	1.14083e-24	6.68725
ref|NM_199212	serum/glucocorticoid regulated kinase 1	1.34089e-20	5.71575
gb|BC067592	Collagen alpha-3(IX)	2.26549e-19	5.42858
ref|NM_200220	START domain containing 10	5.97126e-19	5.3218
ref|NM_200935	Phosphatidylinositol transfer protein alpha	9.13098e-19	5.27527
ref|NM_213556	jun B proto-oncogene	5.34781e-18	5.10692
ref|NM_131765	claudin e	6.41454e-17	4.85605
ref|NM_001004605	arrdc2 arrestin domain containing 2	1.61218e-16	4.76971
gb|BC090913	Histone H2B	1.92123e-16	4.7499
tc|TC280328	Early growth response protein 1	3.44095e-16	4.69054
ref|NM_131801	ornithine decarboxylase 1	4.76783e-16	4.65818
ref|NM_213264	Collagen alpha-1(IX)	1.98506e-15	4.51973
gb|BC081659	claudin 23	2.2833e-15	4.50184
tc|TC278968	Type I cytokeratin	7.73011e-15	4.38632
tc|TC267997	Keratin gamma3	1.04418e-14	4.3559
ref|NM_212579	procollagen, type IX, alpha 2	1.53112e-14	4.32057
gb|BC045962	sphingolipid delta 4 desaturase/C-4 hydroxylase 2	2.2604e-14	4.28507
ref|NM_212726	PGP Phosphoglycolate phosphatase	2.79819e-14	4.26255
ref|NM_131156	type II cytokeratin (ckii)	2.8349e-14	4.25934
ref|NM_212960	sp9 transcription factor	4.27298e-14	4.22048
tc|TC281165	UBE-1c1	1.6302e-13	4.10558
ref|NM_181759	annexin A1b (anxa1b)	1.66457e-13	4.10194
ref|NM_131820	cadherin 1, (E-cadherin)	6.46551e-13	3.98311
gb|BI702854	SJD day 8 fin regeneration Danio rerio cDNA clone IMAGE:4962478	7.2315e-13	3.97035
ref|NM_205569	v-fos FBJ murine osteosarcoma viral oncogene homolog	9.02009e-13	3.9472
ref|NM_131884	CCAAT/enhancer binding protein (cebpb)	9.44898e-13	3.94179
ref|NM_173283	insulin-like growth factor binding protein 1 (igfbp1)	1.13383e-12	3.92516
ref|NM_212832	Occludin A	1.24714e-12	3.91577
ref|NM_181559	glutamate-ammonia ligase (glula)	1.8795e-12	3.88039
tc|TC279257	Type II cytokeratin	2.09047e-12	3.87017
ref|NM_001003485	Calpain-2 catalytic subunit	5.85955e-12	3.77989
ref|NM_131764	claudin c (cldnc)	9.23106e-12	3.74008
ens|ENSDART00000048550	C-type lectin	1.34873e-11	3.70501
ref|NM_001002662	Regulator of G-protein signaling 2	1.34873e-11	3.70416
ref|NM_212565	Danio rerio dual specificity phosphatase 5 (dusp5)	1.81261e-11	3.67772
gb|AW058716	HUMAN T-LYMPHOCYTE MATURATION-ASSOCIATED PROTEIN homolog	3.12784e-11	3.63108
tc|TC270734	Collagen alpha-3(IX)	3.38432e-11	3.62357
ref|NM_212874	EH domain-containing protein 1 (EHD1 )	5.32875e-11	3.58462
ref|NM_212750	jun B proto-oncogene, like (junbl)	6.51545e-11	3.56729
ref|NM_001004641	Dehydrogenase/reductase SDR family member 13 Precursor	9.13324e-11	3.53589
ens|ENSDART00000020513	Mus musculus immunoresponsive gene 1 homolog	1.17209e-10	3.51381
tc|TC279032	Type I cytokeratin	1.17209e-10	3.51388
ref|NM_200964	Cyclic AMP-dependent transcription factor ATF-3	1.37411e-10	3.50004
tc|TC300287	Biphenyl-2,3-diol 1,2-dioxygenase III-related protein	1.52262e-10	3.49082
ref|NM_199778	Elongation of very long chain fatty acids protein 7 (ELOVL7 )	1.96461e-10	3.4694
tc|TC280209	Ets transcription factor	2.12059e-10	3.46233
ref|NM_213092	basic leucine zipper and W2 domains 1, like (bzw1l)	2.41605e-10	3.45002
ens|ENSDART00000019777	Predicted protein, homology to Aspartyl/asparaginyl hydroxylase	6.29039e-10	3.36861
ref|NM_200579	Cytochrome b-245 light chain	6.72112e-10	3.3621
ref|NM_199524	chloride intracellular channel a (clica)	8.29479e-10	3.3445
tc|TC283596	Predicted, putative carbonyl reductase-like protein	9.49937e-10	3.3326
ref|NM_200353	uncoupling protein 2, like (ucp2l)	1.05206e-09	3.32234
gb|BC091458	tRNA pseudouridine synthase A	1.08245e-09	3.31894
gb|BC055392	Long-chain-fatty-acid--CoA ligase 4	1.40649e-09	3.29614
tc|TC291802	IFR1 protein (Interferon-related protein)	1.62244e-09	3.28329
ref|NM_181761	annexin A2a (anxa2a)	1.92724e-09	3.26742
ref|NM_001005989	ELOVL1 Elongation of very long chain fatty acids protein 1	2.20821e-09	3.25519
ref|NM_200881	hydroxysteroid (17-beta) dehydrogenase 12a	2.21757e-09	3.25313
tc|TC292315	Predicted, similar to zinc finger protein 687	2.29961e-09	3.24917
ref|NM_194378	actin related protein 2/3 complex, subunit 5A (arpc5a)	2.63359e-09	3.23775
tc|TC269667	Claudin-8	3.1893e-09	3.22067
ens|ENSDART00000026053	ES1 protein, mitochondrial precursor	3.71124e-09	3.20794
gb|BC056709	heat shock cognate 70-kd protein	3.86316e-09	3.20412
tc|TC291325|tc|TC289584	Procollagen type I alpha 2 chain	3.89801e-09	3.20276
tc|TC291895	Major vault protein	9.34369e-09	3.13004
ref|NM_201492	tropomyosin 3 (tpm3)	9.89824e-09	3.12489
ens|ENSDART00000016258	phosphocholine cytidylyltransferase b	1.04146e-08	3.12028
ref|NM_199215	Danio rerio carbonic anhydrase II (ca2)	1.04566e-08	3.11877
ref|NM_200405	hypoxia-inducible factor 1, alpha subunit, like (hif1al)	1.04566e-08	3.11899
ref|NM_001003501	calpain 9	1.23188e-08	3.10411
ref|NM_201503	Danio rerio matrix metalloproteinase 13 (mmp13)	1.62745e-08	3.08107
ref|NM_213149	FK506 binding protein 5 (fkbp5)	2.13945e-08	3.05681
ref|NM_213175	tumor-associated calcium signal transducer (tacstd)	2.35265e-08	3.04827
ref|NM_001003753	Guanine nucleotide-binding protein alpha-14 subunit	2.35516e-08	3.04764
ref|NM_213067	DUSP1 Dual specificity protein phosphatase 1	2.44813e-08	3.04407
ref|NM_213428	CD9 antigen, like (cd9l)	3.0766e-08	3.0251
ref|NM_198816	6-phosphofructo-2-kinase/fructose-2,6-biphosphatase 4 (pfkfb4)	4.476e-08	2.99419
ref|NM_213190	TNFRSF25 Tumor necrosis factor receptor superfamily member 25	4.89509e-08	2.98668
ref|NM_200198	HEBP2 Heme-binding protein 2	5.31587e-08	2.97972
tc|TC293815	Fatty acid binding protein 3, muscle and heart	5.66818e-08	2.9742
ref|NM_199214	collagen, type I, alpha 1 (col1a1)	6.16659e-08	2.96661
ref|NM_001002335	Kpna2 karyopherin (importin) alpha 2 Gene	6.34806e-08	2.96384
tc|TC289933	Proteoglycan 4	7.75697e-08	2.94697
ref|NM_153657	prostaglandin-endoperoxide synthase 2 (ptgs2)	7.91174e-08	2.94469
ref|NM_201325	major vault protein (mvp)	9.30018e-08	2.93111
ref|NM_199950	Socs3 suppressor of cytokine signaling 3	9.45429e-08	2.92935
gb|BC046020	claudin i	9.59623e-08	2.92772
ref|NM_131014	calymmin (cmn)	9.83302e-08	2.92534
ref|NM_200013	Fhl3 four and a half LIM domains 3 Gene	1.07385e-07	2.91754
ref|NM_173221	aldehyde dehydrogenase 3 family	1.229e-07	2.90625
tc|TC289688	Schwann cell-specific EGF-like repeat autocrine factor	1.229e-07	2.9059
ens|ENSDART00000034549	Predicted hypothetical Protein, no homology found	1.229e-07	2.90519
ref|NM_213468	Aquaporin-3	1.26229e-07	2.90221
ref|NM_200184	clade E (nexin, plasminogen activator inhibitor type 1)	1.31058e-07	2.89751
ref|NM_001001942	secreted acidic cysteine rich glycoprotein (sparc)	1.35368e-07	2.89388
ens|ENSDART00000031719	epithelial V-like antigen 1	1.40474e-07	2.89038
gb|AY538257	fibronectin 3	1.4582e-07	2.88704
tc|TC296121	Regulator of G-protein signaling 4	1.77992e-07	2.87025
ref|NM_001003744	Nras neuroblastoma ras oncogene Gene	1.92669e-07	2.86367
gb|BC078421	myogenin	2.04453e-07	2.85781
ref|NM_213173	Sequestosome-1	2.39386e-07	2.84433
tc|TC292148	ETR101 protein	2.61651e-07	2.83582
ref|NM_212588	solute carrier family 20 (phosphate transporter), member 1 (slc20a1)	3.10411e-07	2.82175
ref|NM_212869	TRIB3 Tribbles homolog 3	3.92807e-07	2.80153
gb|BC081644	solute carrier family 35, member B3	3.9786e-07	2.80016
gb|AW153491	Sugano Kawakami zebrafish DRA Danio rerio cDNA clone	4.00442e-07	2.79928
gb|BC058869	npp-10 (human NUCLEOPORIN, 98-KD can promote leukemias )	4.95559e-07	2.78161
ref|NM_181757	annexin A5 (anxa5)	4.95968e-07	2.78118
ref|NM_200060	CDC42SE1 CDC42 small effector protein 1	6.35609e-07	2.76088
gb|AI964276	Tnni2 troponin I, skeletal, fast 2 Gene	6.61741e-07	2.75734
ens|ENSDART00000013945	TAX1BP3 Tax1-binding protein 3	6.87134e-07	2.75405
ref|NM_213470	Tax1 (human T-cell leukemia virus type I) binding protein 3 (tax1bp3)	7.23936e-07	2.74965
ref|NM_001002328	EBP 3-beta-hydroxysteroid-Delta(8),Delta(7)-isomerase	7.76318e-07	2.74387
tc|TC281772	Heparin-binding EGF-like growth factor	7.88842e-07	2.74227
tc|TC268488	Claudin i, complete	8.0421e-07	2.74042
gb|BC090452	Alpha-1 type XI collagen	9.2234e-07	2.72944
